# Supplementary material for: Identifying distinctive brain regions related to consumer choice behaviors on branded foods using activation likelihood estimation and machine learning
Source: Front Comput Neurosci. 2024 Jan 17;18:1310013. doi: 10.3389/fncom.2024.1310013 (PMC10875973; doi:10.3389/fncom.2024.1310013)
Supplement: Supplementary file 2 [file Table_2.XLSX]

## Sheet: (20 40 -10)
Table S2. One-hot vector corresponded to (20 40 -5).
	x
Coordinate	-68	-67	-66	-65	-64	-63	-62	-61	-60	-59	-58	-57	-56	-55	-54	-53	-52	-51	-50	-49	-48	-47	-46	-45	-44	-43	-42	-41	-40	-39	-38	-37	-36	-35	-34	-33	-32	-31	-30	-29	-28	-27	-26	-25	-24	-23	-22	-21	-20
Value	0	0	0	0	0	0	0	0	0	0	0	0	0	0	0	0	0	0	0	0	0	0	0	0	0	0	0	0	0	0	0	0	0	0	0	0	0	0	0	0	0	0	0	0	0	0	0	0	0
[truncated: 382 more columns]
